# Supplementary material
Source: PubMed Central journal article supplement (PMC6994234)
Supplement: NIHMS1063547-supplement-supplemental.pdf [file NIHMS1063547-supplement-supplemental.pdf]

## Supplemental Information

### **Selenocysteine Substitution into a Class I Ribonucleotide Reductase**

*Brandon L. Greene<sup>†\*</sup>, JoAnne Stubbe<sup>‡§</sup>, and Daniel G. Nocera<sup>#</sup>*

<sup>†</sup>Department of Chemistry and Biochemistry, University of California Santa Barbara, Santa Barbara CA 93106

<sup>‡</sup>Department of Chemistry and <sup>§</sup>Department of Biology, Massachusetts Institute of Technology, Cambridge MA 20139

<sup>#</sup>Department of Chemistry and Chemical Biology, Harvard University, Cambridge MA 02138

\*Email: [green@chem.ucsb.edu](mailto:green@chem.ucsb.edu)

## Table of Contents

|                                                                                                                         |     |
|-------------------------------------------------------------------------------------------------------------------------|-----|
| <b>Figure S1.</b> SDS-PAGE of C <sub>439</sub> U and C <sub>225</sub> U expression in ME6 cells                         | S3  |
| <b>Figure S2.</b> SDS-PAGE of C <sub>439</sub> U purification                                                           | S4  |
| <b>Table S1.</b> Selenium quantitation in C <sub>439</sub> U, C <sub>225</sub> U, and wt $\alpha_2$                     | S5  |
| <b>Table S2.</b> Steady state and single turnover activity of C <sub>439</sub> U, C <sub>225</sub> U, and wt $\alpha_2$ | S6  |
| <b>Figure S3.</b> HPLC standards for cytosine, cytidine, and deoxycytidine                                              | S7  |
| <b>Figure S4.</b> X-band EPR spectrum of N <sub>3</sub> CDP reacted C <sub>439</sub> U                                  | S8  |
| <b>Figure S5.</b> Short timescale SF UV-vis kinetics at 460 nm                                                          | S9  |
| <b>Figure S6.</b> Long timescale SF UV-vis kinetics at 460 nm                                                           | S10 |
| <b>Figure S7.</b> SF controls with wt and C <sub>439</sub> U $\alpha_2$                                                 | S11 |
| <b>Table S3.</b> SF kinetic fitting parameters                                                                          | S12 |
| <b>Figure S8.</b> Mechanism of RNR inhibition by 2'-F/Cl substituted NDPs                                               | S13 |
| <b>Figure S9.</b> X-band EPR spectrum C <sub>225</sub> U $\alpha_2$ reaction with CDP/ $\beta_2$                        | S14 |
| <b>Figure S10.</b> Mechanism of RNR inhibition by N <sub>3</sub> NDP                                                    | S15 |

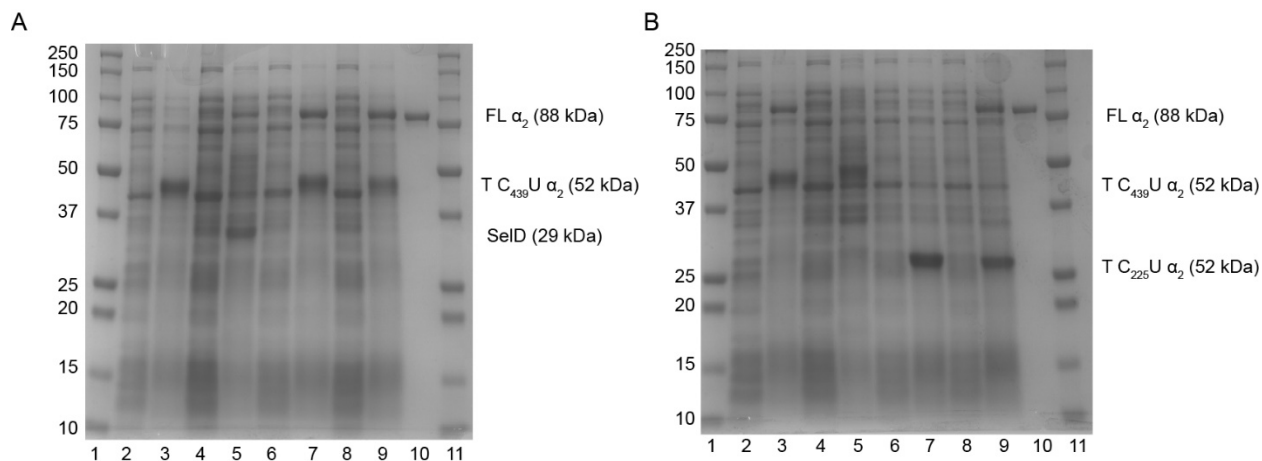

**Figure S1.** SDS-PAGE analysis of IPTG/arabinose dependence of C<sub>439</sub>U and C<sub>225</sub>U expression in ME6 cells. General conditions as follows; 10 mL culture inoculated with a single colony from freshly prepared plates, 100 µg/mL ampicillin, 50 µg/mL kanamycin, 30 µM Na<sub>2</sub>SeO<sub>3</sub> in LB media. Arabinose (ara) added at OD<sub>600</sub> = 0.5, IPTG added at OD<sub>600</sub> = 0.8. Cells grown at 37 °C shaking at 200 rpm until OD = 0.5 reached, then temperature dropped to 30 °C and grown for an additional 20 h. Pre- and post-induction cell samples were collected at OD = 0.5 and OD = 4-6 respectively. **A** C<sub>439</sub>U expression as a function of induction conditions. *Lane 1*, molecular weight marker; *lane 2*, C<sub>439</sub>U 0.2 mM IPTG/0% (w/v) ara pre-induction; *lane 3*, C<sub>439</sub>U 0.2 mM IPTG/0% ara post-induction; *lane 4*, C<sub>439</sub>U 0 mM IPTG/0.1% ara pre-induction; *lane 5*, C<sub>439</sub>U 0 mM IPTG/0.1% ara post-induction; *lane 6*, C<sub>439</sub>U 0.2 mM IPTG/0.1% ara pre-induction; *lane 7*, C<sub>439</sub>U 0.2 mM IPTG/0.1% ara post-induction; *lane 8*, C<sub>439</sub>U 0.2 mM IPTG/0.2% ara pre-induction; *lane 9*, C<sub>439</sub>U 0.2 mM IPTG/0.2% ara post-induction; *lane 10*, authentic wt α<sub>2</sub> standard; *lane 11*, molecular weight marker. FL = full length; T = truncated. **B** *Lane 1*, molecular weight marker; *lane 2*, C<sub>439</sub>U 0.4 mM IPTG/0.2% ara pre-induction; *lane 3*, C<sub>439</sub>U 0.4 mM IPTG/0.2% ara post-induction; *lane 4*, C<sub>439</sub>U 0 mM IPTG/0% ara pre-induction; *lane 5*, C<sub>439</sub>U 0 mM IPTG/0% ara post-induction; *lane 6*, C<sub>225</sub>U 0.2 mM IPTG/0% ara pre-induction; *lane 7*, C<sub>225</sub>U 0.2 mM IPTG/0% ara post-induction; *lane 8*, C<sub>225</sub>U 0.2 mM IPTG/0.1% ara pre-induction; *lane 9*, C<sub>225</sub>U 0.2 mM IPTG/0.1% ara post-induction; *lane 10*, authentic wt α<sub>2</sub> standard; *lane 11*, molecular weight marker.

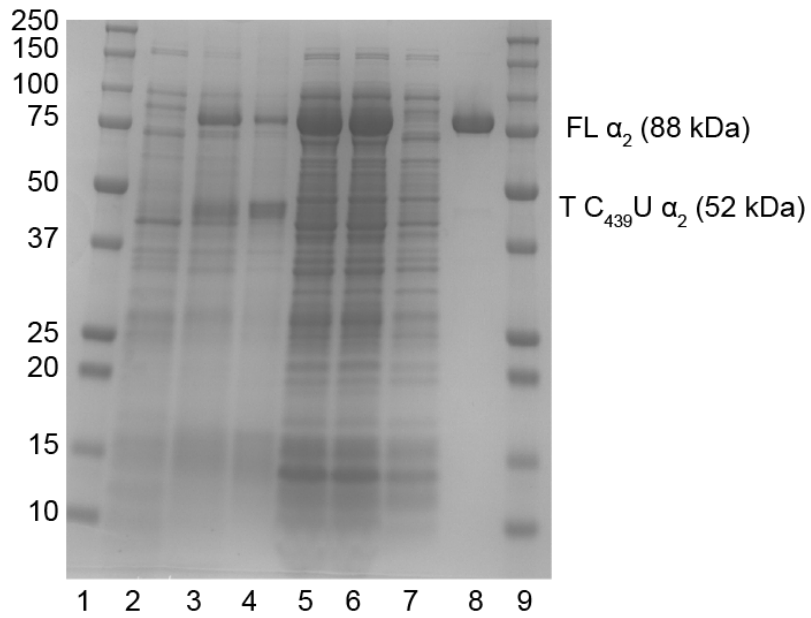

**Figure S2.** SDS-PAGE analysis of C<sub>439</sub>U purification. *Lane 1*, molecular weight marker; *lane 2*, pre-induction ME6 cells; *lane 3*, 20 h post-induction ME6 cells; *lane 4*, cell lysate debris; *lane 5*, cell lysate supernatant; *lane 6*, DNA precipitation supernatant; *lane 7*, Ni-NTA column flow-through at 50 mM imidazol; *lane 8*, eluted C<sub>439</sub>U  $\alpha_2$  (250 mM imidazole); *lane 9* molecular weight marker. FL = full length; T = truncated.

**Table S1.** Selenium quantitation in C<sub>439</sub>U, C<sub>225</sub>U, wt, and C<sub>439</sub>S  $\alpha_2$  under various expression conditions.

| Protein            | Expression Conditions                                                         | Yield (mg/g) | [Se]/[ $\alpha$ ] |
|--------------------|-------------------------------------------------------------------------------|--------------|-------------------|
| C <sub>439</sub> U | 100 $\mu$ M Na <sub>2</sub> SeO <sub>3</sub><br>0.1% Arabinose<br>1 mM IPTG   | 9            | 0.54 (0.06)       |
| C <sub>439</sub> U | 100 $\mu$ M Na <sub>2</sub> SeO <sub>3</sub><br>0.1% Arabinose<br>0.5 mM IPTG | 4            | 0.70 (0.06)       |
| C <sub>439</sub> U | 30 $\mu$ M Na <sub>2</sub> SeO <sub>3</sub><br>0.1% Arabinose<br>0.25 mM IPTG | 1-2          | 1.0 (0.1)*        |
| C <sub>225</sub> U | 30 $\mu$ M Na <sub>2</sub> SeO <sub>3</sub><br>0.1% Arabinose<br>0.25 mM IPTG | 0.5          | 0.82 (0.07)       |
| wt                 | 30 $\mu$ M Na <sub>2</sub> SeO <sub>3</sub><br>0.1% Arabinose<br>0.25 mM IPTG | 3.5          | 0.006 (0.002)     |
| C <sub>439</sub> S | 30 $\mu$ M Na <sub>2</sub> SeO <sub>3</sub><br>0.1% Arabinose<br>0.25 mM IPTG | 3.0          | 0.002 (0.003)     |

\* Three independent preparations under these conditions have been analyzed and the error in [Se]/[ $\alpha$ ] is significantly larger among triplicate samples of a single protein preparation (+/- 9%) than among the averages of the three preparations (+/- 2%).

**Table S2.** Steady state and single turnover activity of wt, C<sub>439</sub>X, and C<sub>225</sub>X proteins (X = S, U).

| <b>Protein</b>                                         | <b>Steady State (units)</b> | <b>Single Turnover</b> |
|--------------------------------------------------------|-----------------------------|------------------------|
| wt                                                     | 1920 (30)                   | 1.6 (0.2)              |
| C <sub>439</sub> S                                     | 20 (20)                     | 0.02 (0.02)            |
| C <sub>439</sub> U                                     | 30 (20)                     | 0.02 (0.01)            |
| C <sub>225</sub> U                                     | 30 (20)                     | 0.04 (0.04)            |
| WT<br>(-O <sub>2</sub> , +200 μM DTT)                  | 1900 (40)                   | 11 (3)                 |
| C <sub>439</sub> U<br>(-O <sub>2</sub> , +200 μM DTT)  | n.d.                        | 0.24 (0.03)            |
| C <sub>225</sub> U<br>(-O <sub>2</sub> , + 200 μM DTT) | n.d.                        | 7.9 (0.9)              |

n.d., not determined

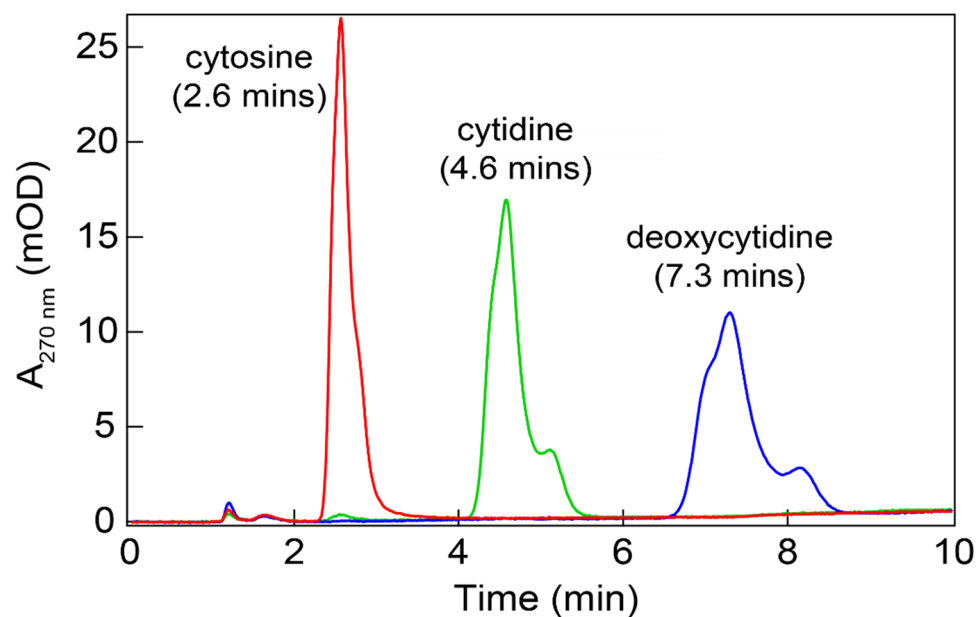

**Figure S3.** Individual HPLC standards for cytosine (red), cytidine (green), deoxycytidine (blue). Standards were prepared at 50  $\mu\text{M}$  in 5 mM  $\text{KPi}$  pH = 6.8. Elution gradient is identical to that reported in the materials and methods.

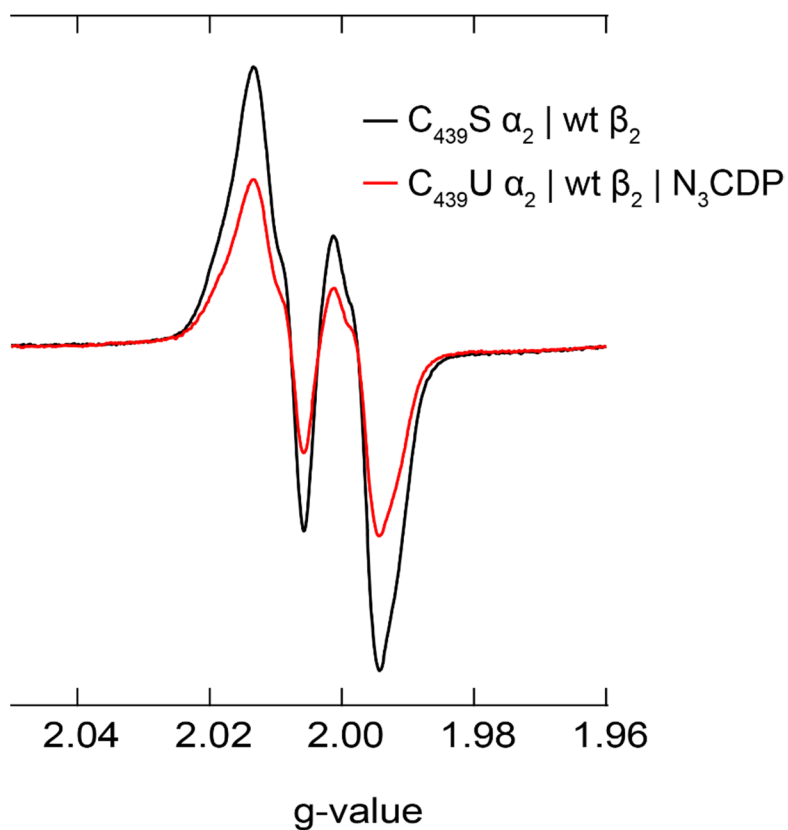

**Figure S4.** X-band EPR spectra of 50  $\mu\text{M}$  wt  $\beta_2$  with 50  $\mu\text{M}$   $C_{439}S \alpha_2$ , 1 mM CDP and 3 mM ATP (black) and 50  $\mu\text{M}$   $C_{439}U \alpha_2$ , 0.2 mM  $N_3\text{CDP}$  and 3 mM ATP (red). Spectra recorded at 80 K with 1 Gauss modulation amplitude, 100 kHz modulation frequency, and 20  $\mu\text{W}$  microwave power.



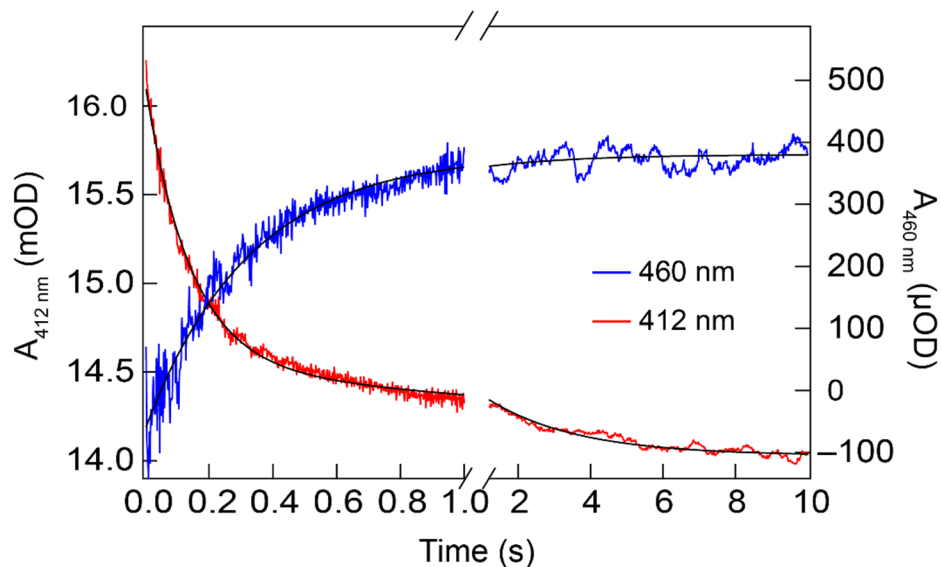

**Figure S5.** Stopped-flow UV-vis kinetic traces 412 nm (red, as reported in the main text), 460 nm (blue) and associated bi- and monoexponential fits respectively (black). Sample conditions identical to those of Figure 4 of the main text. The 460 nm transient was equally well fit by mono- or biexponential, likely due to the lower signal to noise, and thus the monoexponential fit is reported. The  $k_{\text{obs}} = 3.19 (0.05) \text{ s}^{-1}$  appears intermediate between the two observed rate constants for the fast ( $\sim 7 \text{ s}^{-1}$ ) and slow ( $0.4 \text{ s}^{-1}$ ) phases for both 340 nm and 412 nm.

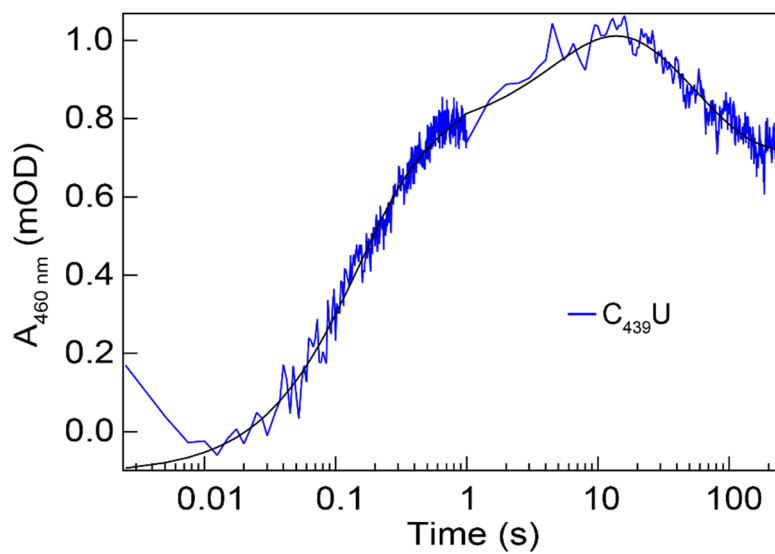

**Figure S6.** Long timescale stopped-flow kinetics for C<sub>439</sub>U (blue)  $\alpha_2$  mixing with wt  $\beta_2$  to a final concentration of 20  $\mu$ M  $\alpha_2\beta_2$ , 1 mM CDP and 3 mM ATP in assay buffer monitored at 460 nm.

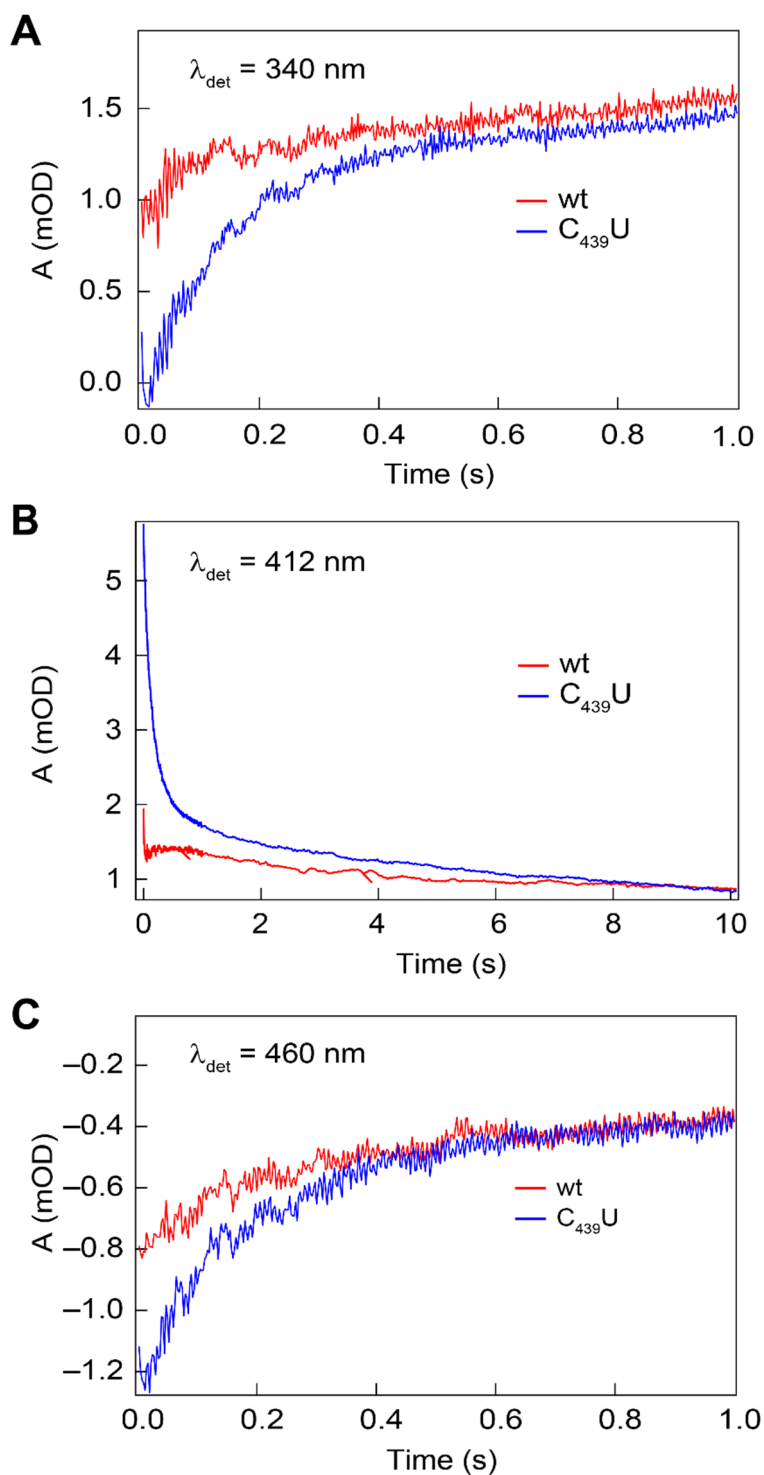

**Figure S7.** Stopped-flow kinetic comparison between wt (red) and  $C_{439}\text{U}$  (blue)  $\alpha_2$  mixing with wt  $\beta_2$  to a final concentration of  $20 \mu\text{M}$   $\alpha_2\beta_2$ ,  $1 \text{ mM}$  CDP and  $3 \text{ mM}$  ATP in assay buffer. Transients recorded at **A**  $340 \text{ nm}$ , **B**  $412 \text{ nm}$ , and **C**  $460 \text{ nm}$ . The kinetics of induced absorption (**A** and **C**) and decay (**B**) were again described well by a biexponential function with statistically identical kinetics to those reported at  $10 \mu\text{M}$   $\alpha_2\beta_2$ .

**Table S3.** Fitting parameters for SF UV-vis experiments.

| $\alpha$                        | $\lambda / \text{nm}$ | $A_1 / \mu\text{OD}$ | $k_1 / \text{s}^{-1}$ | $A_2 / \mu\text{OD}$ | $k_2 / \text{s}^{-1}$ | $A_3 / \mu\text{OD}$ | $k_3 / \text{s}^{-1}$ |
|---------------------------------|-----------------------|----------------------|-----------------------|----------------------|-----------------------|----------------------|-----------------------|
| C <sub>439</sub> U <sup>#</sup> | 340                   | 570 (20)             | 6.5 (0.3)             | 360 (20)             | 0.42 (0.03)           |                      |                       |
|                                 | 410                   | -1,580 (20)          | 7.1 (0.1)             | -400 (40)            | 0.40 (0.01)           |                      |                       |
|                                 | 460                   | 440 (10)             | 3.19 (0.05)           |                      |                       |                      |                       |
| C <sub>439</sub> U <sup>*</sup> | 460                   | 770 (10)             | 7.1 (0.2)             | 490 (20)             | 0.44 (0.04)           | -430 (20)            | 0.044 (0.01)          |
| WT <sup>*</sup>                 | 340                   | 520 (10)             | 2.9 (0.2)             |                      |                       |                      |                       |
|                                 | 412                   |                      |                       | -670 (10)            | 0.29 (0.01)           |                      |                       |
|                                 | 460                   | 400 (10)             | 3.2 (0.1)             |                      |                       |                      |                       |

<sup>#</sup> Experiments performed at 10  $\mu\text{M}$  final concentration.

<sup>\*</sup> Experiments performed at 20  $\mu\text{M}$  final concentration.

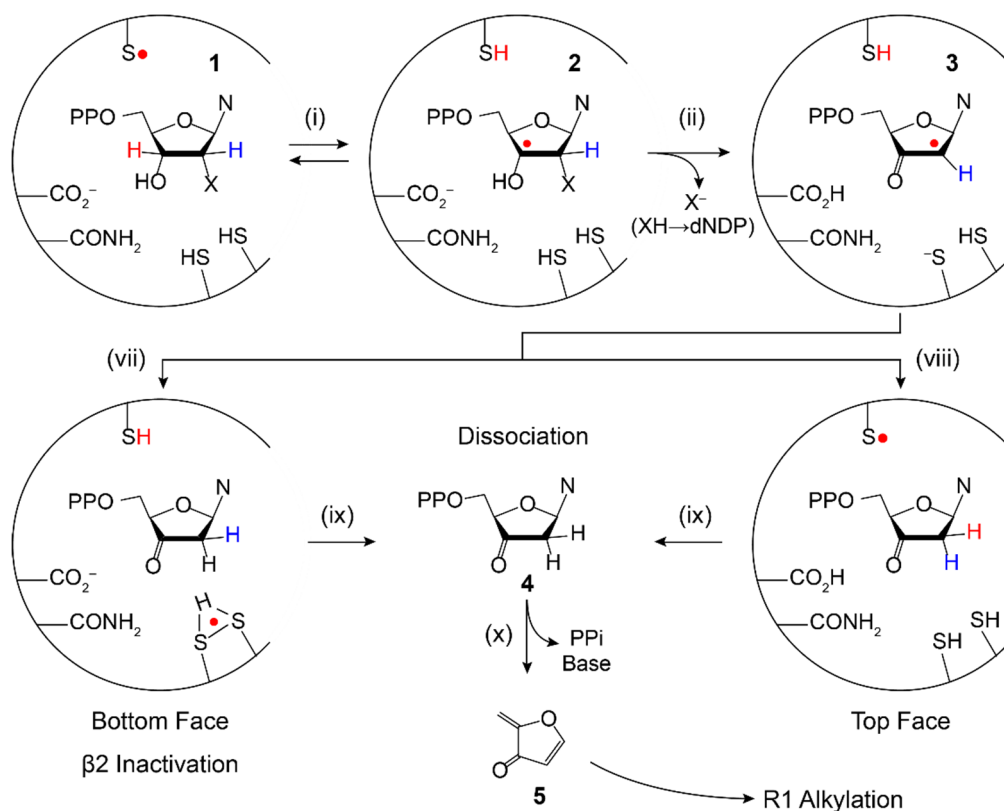

**Figure S8.** Mechanism of inactivation of RNR by mechanism-based inhibitors 2'-deoxy-2'-X NDP (X = F or Cl). The mechanism of inactivation depend on the nature of substrate radical reduction (steps vii vs. viii). During radical substrate reduction from the top face,  $\alpha_2$  is inactivated through alkylation of the essential sulfhydryl groups by **5**, but the thiyl, and thus the essential Y<sub>122</sub>• in  $\beta$ , are maintained. Conversely, reduction by the bottom face inactivates both  $\alpha_2$  and  $\beta_2$  by trapping on the bottom face.

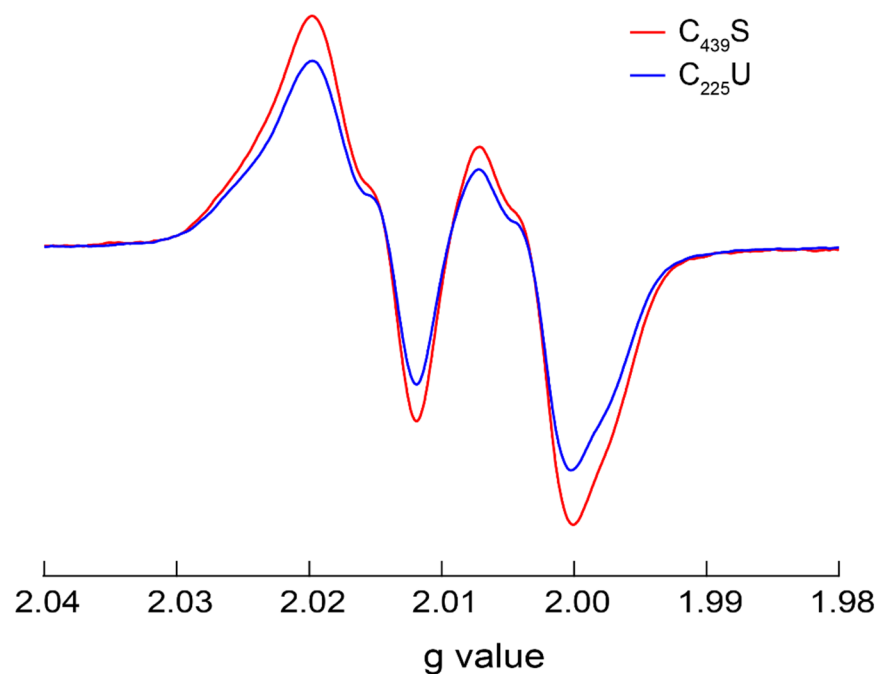

**Figure S9.** X-band EPR spectrum of 50  $\mu$ M wt  $\beta_2$  quenched at 10 s after mixing with 1 mM CDP, 3 mM ATP, and  $C_{225}U$  (blue) or  $C_{439}S$  (red)  $\alpha_2$ . Spectra recorded at 80 K with 1 Gauss modulation amplitude, 100 kHz modulation frequency, and 20  $\mu$ W microwave power.

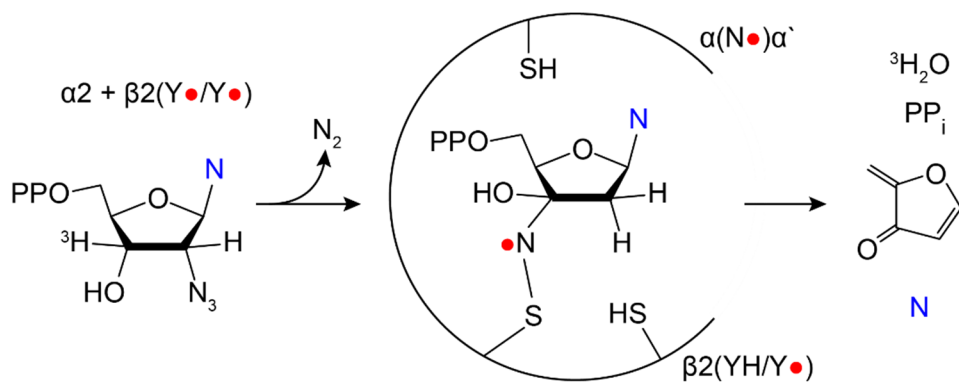

**Figure S10.** Mechanism of RNR inhibition by  $N_3NDP$ .
